# Supplementary material for: Hexamethylene bisacetamide impairs NK cell-mediated clearance of acute T lymphoblastic leukemia cells and HIV-1-infected T cells that exit viral latency
Source: PubMed Central journal article supplement (PMC6416400; doi:10.1038/s41598-019-40760-x), 2019-03-13
Supplement: 41598_2019_40760_MOESM1_ESM.pdf [file 41598_2019_40760_MOESM1_ESM.pdf]

## **Supplementary Figure S1**

**Hexamethylene bisacetamide impairs NK cell-mediated clearance of acute T lymphoblastic leukemia cells and HIV-1-infected T cells that exit viral latency**

Erica Giuliani, Maria Giovanna Desimio, and Margherita Doria

**Original blots for figure 3D**

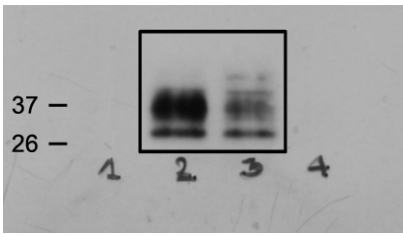

Probed with anti-NKG2D mAb

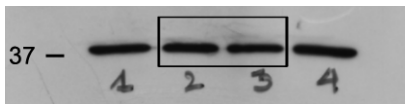

Same filter re-probed with anti-GAPDH mAb

**Original blots for figure 3E**

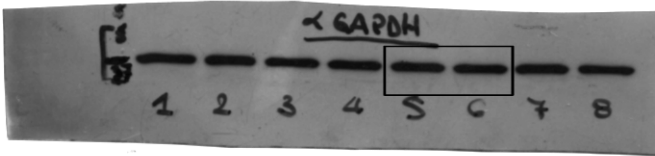

Top filter: probed with anti-GAPDH mAb

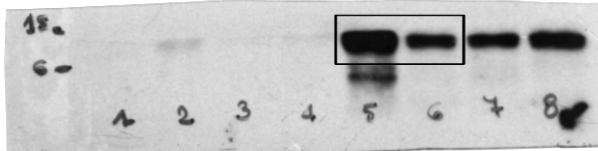

Bottom: probed with anti-DAP10 mAb

**Supplementary Figure S1.** Uncropped images of the western blots. The original images of the western blots depicted in figures 3D and 3E are shown. The boxed areas indicate the regions displayed in the manuscript
